# Supplementary material for: Nucleic acid-directed self-assembly of multifunctional gold nanoparticle imaging agents
Source: Royal Society of Chemistry journal article supplement (doi:10.1039/c3bm60070j), 2013-01-01
Supplement: c3bm60070j.pdf [file c3bm60070j.pdf]

Supporting Information:

# Nucleic Acid-directed Self-assembly of Multifunctional Gold Nanoparticle Imaging Agents<sup>1</sup>

Ziyan Zhang,<sup>†</sup> Yongjian Liu,<sup>‡</sup> Chad Jarreau,<sup>‡</sup> Michael J. Welch,<sup>‡</sup> and John-Stephen A. Taylor<sup>\*†</sup>

<sup>†</sup>Department of Chemistry, Washington University in St. Louis, St. Louis, Missouri 63130, United States, and <sup>‡</sup>Mallinckrodt Institute of Radiology, Washington University School of Medicine, St. Louis, Missouri 63110, United States

\*E-mail: [taylor@wuchem.wustl.edu](mailto:taylor@wuchem.wustl.edu)

<sup>1</sup> This work is dedicated to Dr. Michael J. Welch, who passed away on May 6th, 2012.

| Figure                                                                                                                                                             | Page |
|--------------------------------------------------------------------------------------------------------------------------------------------------------------------|------|
| <b>Figure S1.</b> Determination of the molar absorption coefficients of the gold nanoparticles .                                                                   | S2   |
| <b>Figure S2.</b> Determination of the average ODN loading of ODN·AuNP.                                                                                            | S3   |
| <b>Figure S3.</b> A) Temperature-dependent fluorescence curves for A) Cy5-PNA·ODN-AuNP and B) Cy5-PNA.                                                             | S4   |
| <b>Figure S4.</b> Van't Hoff analysis of the melting temperature curve to yield $\Delta H$ and $\Delta S$ for PNA·ODN duplex formation with free ODN and ODN-AuNP. | S5   |

A)

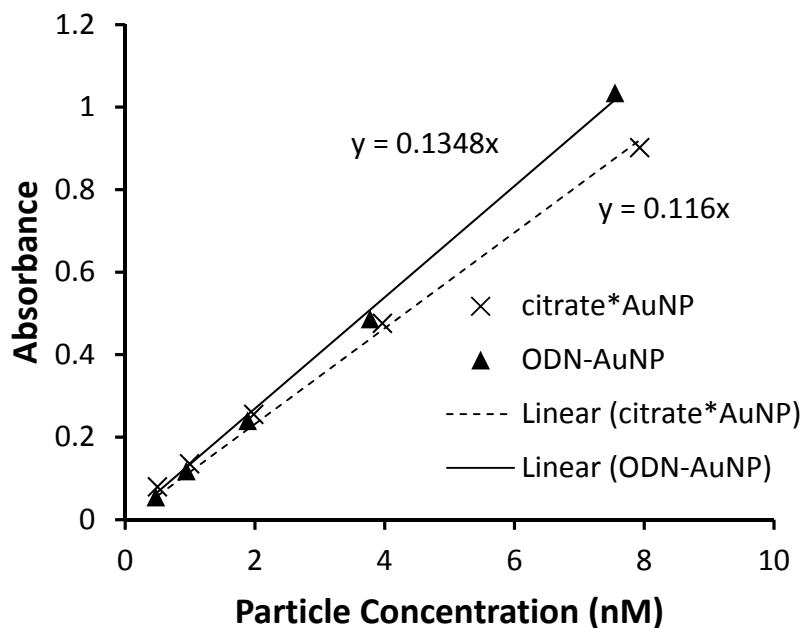

B)

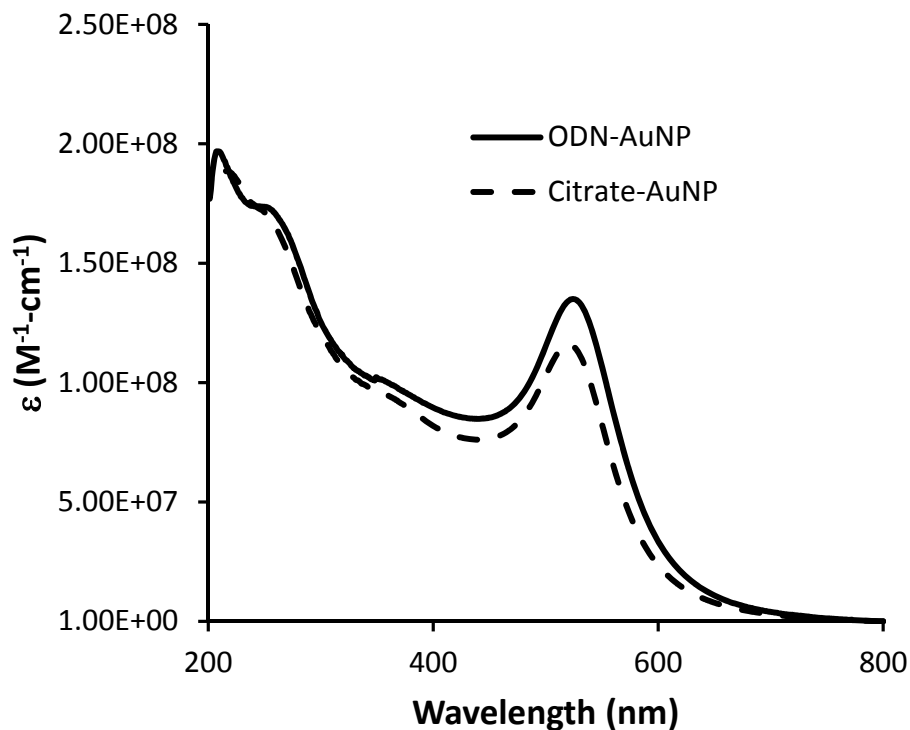

**Figure S1.** Determination of the molar absorption coefficients of the gold nanoparticles .  
A) Absorbance was measured as a function of concentration at the absorption maximum of 520 nm for the citrate•AuNP, and at 524 nm for the ODN-AuNP. The concentration of the particles was calculated as described in the experimental section. B) Molar extinction coefficient spectra for citrate-AuNP and ODN-AuNP.

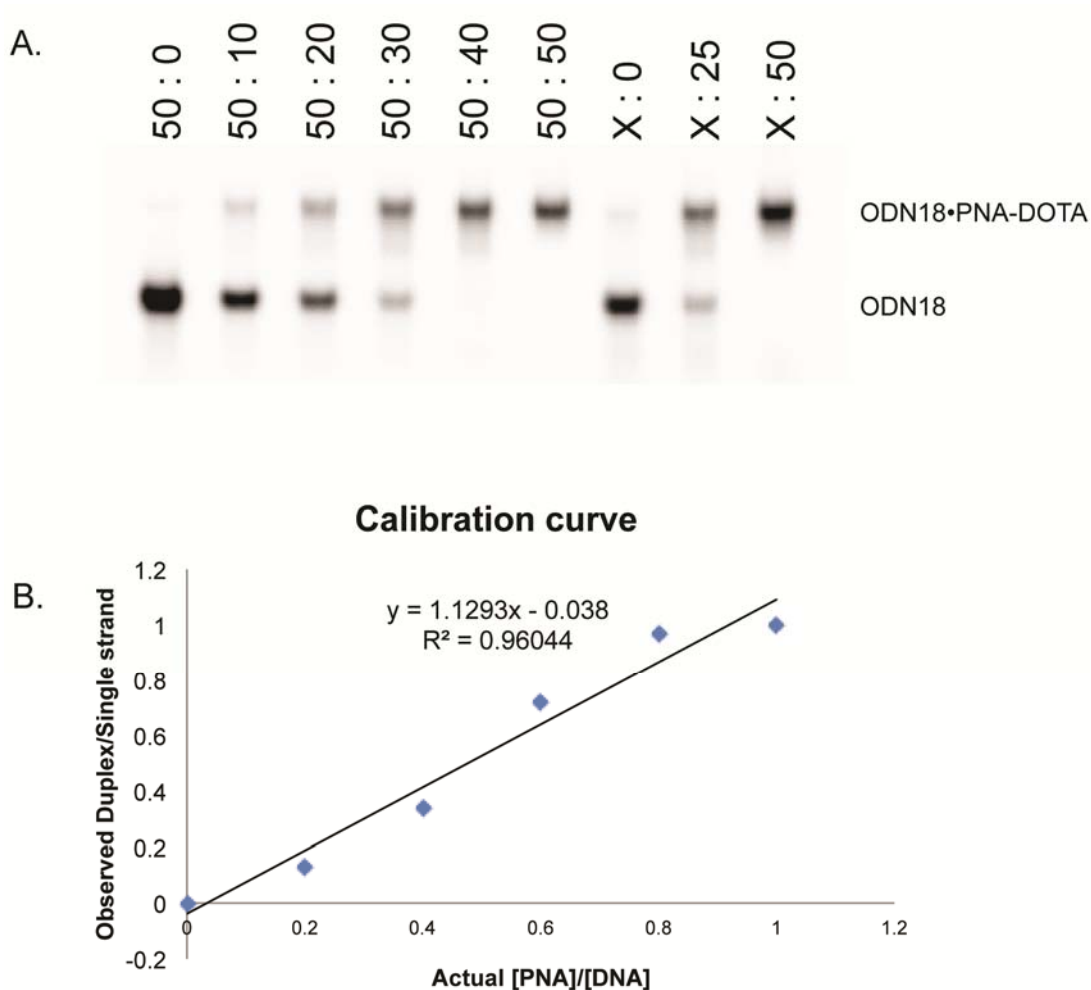

**Figure S2.** Determination of the average ODN loading of ODN·AuNP. A) Gel electrophoresis of  $^{32}\text{P}$ -labeled ODN of known concentration and  $^{32}\text{P}$ -labeled ODN from cyanide treatment of ODN·AuNP that were titrated with a known concentration of PNA-DOTA. B) Calibration curve generated from lanes 1-6 of A).

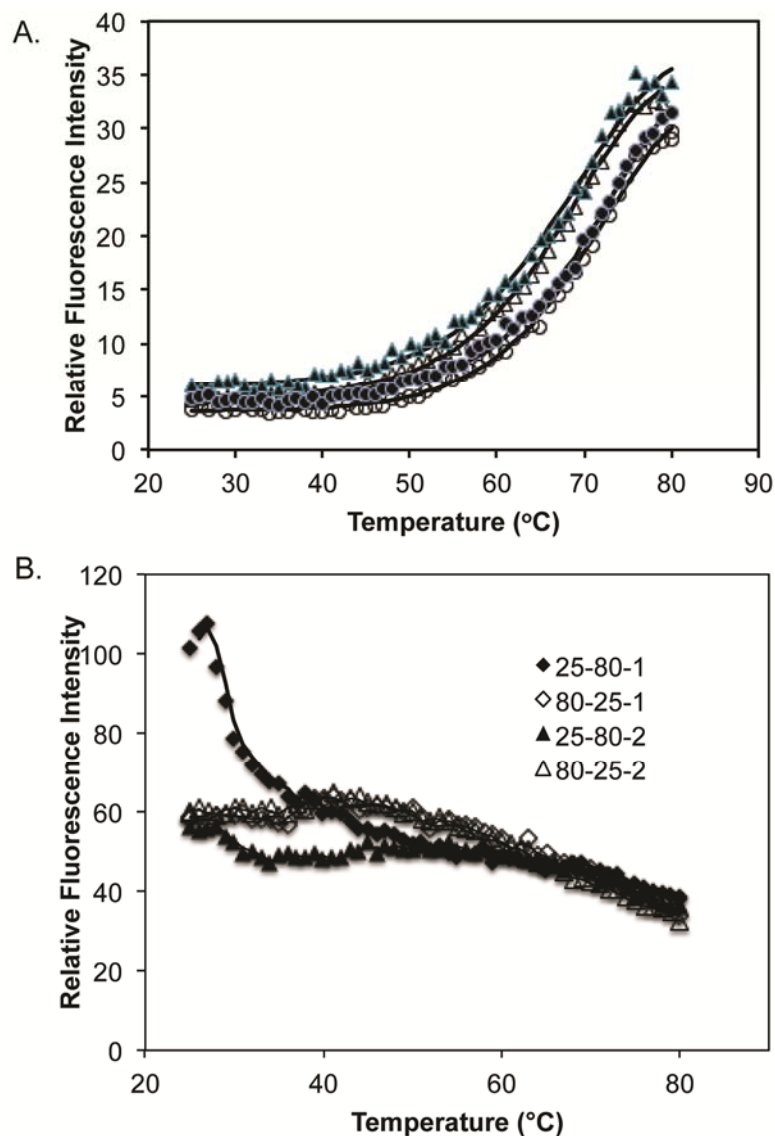

**Figure S3.** A) Temperature-dependent fluorescence curves for A) Cy5-PNA·ODN-AuNP and B) Cy5-PNA. Excitation was carried out at 633 nm and emission was detected at 663 nm. The high fluorescence in the first heating curve (25-80-1) is likely an artifact.

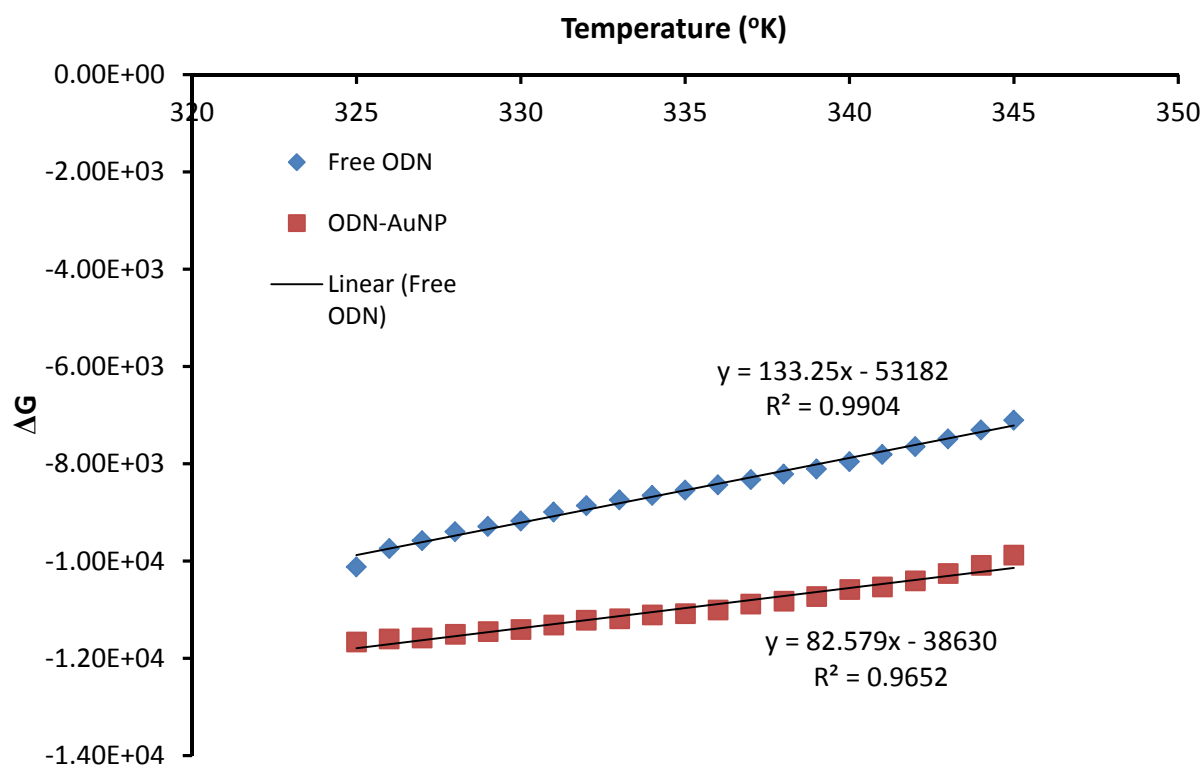

**Figure S4.** Van't Hoff analysis of the melting temperature curve to yield  $\Delta H$  and  $\Delta S$  for PNA•ODN duplex formation with free ODN and ODN-AuNP. The fraction single strand data from Figure 6 were converted to  $K_{eq}$  values taking into account the concentration of ODN and PNA used. The  $K_{eq}$  values were then converted to  $\Delta G$  values in calories and plotted against T in degrees Kelvin. The slope from a linear fit to the data gave  $\Delta S^\circ$  in cal/deg-mol and  $\Delta H^\circ$  in calories.
